# Supplementary material
Source: PubMed Central journal article supplement (PMC4343096)
Supplement: pnas.201415621SI.pdf [file pnas.201415621SI.pdf]

# Supporting Information

Cohen et al. 10.1073/pnas.1415621112

## SI Materials and Methods

### Construction of Plasmids.

**Construction of plasmids pTR785 and pTR791.** Plasmids pTR785 and pTR791 contain the Ubc7 ORF under its own promoter (1,000 bp downstream of the ATG) and a C-terminal 3HA tag. Notably, it is essential to have a large promoter fragment of ~1,000 bp because a shorter promoter of 500 bp did not induce Ubc7 expression. A PCR fragment containing the Ubc7 promoter, ORF, and 3HA was amplified from strain TRy344 and cloned into pJET1.2/blunt plasmid (Thermo Scientific) to obtain pTR723. The UBC7p-Ubc7-3HA fragment was excised from pTR723 with BglII and was cloned into the BamHI site of pRS303 to obtain pTR785 or to pRS313 to obtain pTR791.

**Construction of plasmids pTR948 and pTR953.** A PCR fragment of the Ubc7<sub>KO</sub> ORF was amplified from plasmid pTR468 and cloned into pTR791 cut with BlnI by homologous recombination to obtain pTR948. Then a PvuII fragment containing Ubc7p-Ubc7<sub>KO</sub>-3HA from pTR948 was cloned into pRS303 to generate pTR953.

**Construction of plasmid pTR717.** A *met25p-Deg1-Flag-Vma12-Ura3* fragment was cut from pTR458 with PvuII and ligated into the SmaI site of the YDp-K vector.

**Construction of plasmid pTR941.** A CPY\*-HA fragment was cut from pTR414 with SalI and EcoRI and was cloned into pRS314.

**Construction of plasmids pTR1454 and pTR1456.** UBC7p-Ubc7-3HA and UBC7p-Ubc7<sub>R118</sub>-3HA fragments were excised from pTR785 and pTR1086, respectively, with NcoI/SalI and were cloned into pRS314 plasmid.

**Construction of plasmid pTR1475.** The NcoI/SalI fragment of Hrd1 RING (amino acids 287–531) was cut from pTR1469 and cloned into the pET-42b(+) plasmid.

**Construction of plasmid pTR1544.** The Flag epitope was added to the N terminus of Ub<sub>R48</sub> (pTR843) by transfer PCR (1).

**Plasmids made by site directed mutagenesis.** pTR977, pTR1077, pTR1078, pTR1086, and pTR1111 were generated using pTR785 as a template. pTR1119, pTR1121, pTR1125, pTR1127, and pTR1129 were generated using pTR953 as a template. pTR1138, pTR1500, pTR1502, pTR1514, pTR1528, and pTR1617 were generated using pTR526 as a template. pTR1530 and pTR1621 were generated using pTR1454 as a template. pTR1611 and pTR1615 were generated using pTR1544 as a template.

### Construction of Yeast Strains.

**Construction of yeast strains TRy763, TRy1045, TRy1070, TRy1072, TRy1074, and TRy1184.** pTR785 or its related derivatives were linearized with AfeI and integrated into the *HIS3* locus of TRy109 by homologous recombination.

**Construction of yeast strains to construct TRy508, TRy802, TRy832, TRy864, TRy957, TRy960, TRy975, TRy989, TRy1033, TRy1035, TRy1037, TRy1041, TRy1043, and TRy1045.** pTR717 was linearized with HpaI and integrated into the *LYS2* locus of TRy109 by homologous recombination to obtain yeast strain TRy505. Then pTR785 or its related derivatives were linearized with AfeI and transformed into the *HIS3* locus of TRy505.

**Construction of yeast strain TRy1126.** To knock out the *UBC7* ORF, a PCR fragment containing the KanMX cassette surrounded by 150 bp of *UBC7* flanking regions was integrated into yeast strain YPH499 (2).

**Construction of yeast strains TRy1281 and TRy1282.** Plasmid pRH373 (3) containing UBC7-2HA was linearized with BsgI and integrated into TRy1126 or TRy1148, respectively, at the *TRP1* locus.

**Construction of yeast strain TRy786.** Yeast strain TRy786 was constructed by crossing yeast strains TRy508 and TRy457.

- Erijman A, Shifman JM, Peleg Y (2014) A single-tube assembly of DNA using the transfer-PCR (TPCR) platform. *Methods Mol Biol* 1116:89–101.
- Sikorski RS, Hieter P (1989) A system of shuttle vectors and yeast host strains designed for efficient manipulation of DNA in *Saccharomyces cerevisiae*. *Genetics* 122(1):19–27.

- Gardner RG, Shearer AG, Hampton RY (2001) In vivo action of the HRD ubiquitin ligase complex: Mechanisms of endoplasmic reticulum quality control and sterol regulation. *Mol Cell Biol* 21(13):4276–4291.

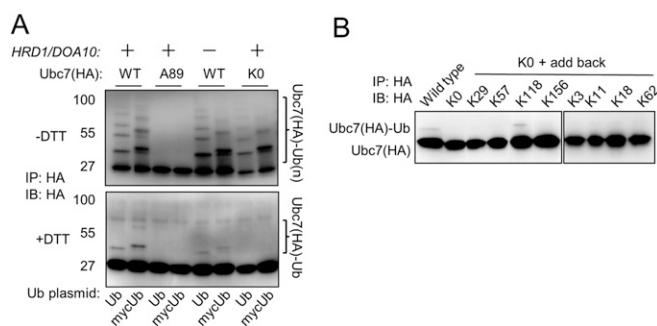

**Fig. S1.** Cue1-bound Ubc7 is auto-ubiquitylated in vivo on both DTT-sensitive and -resistant acceptor sites. Ubc7 was immunoprecipitated using anti-HA polyclonal Abs from yeast cell extracts coexpressing Ubc7-3HA and either Ub<sub>A76</sub> or N-tagged Myc-Ub<sub>A76</sub>. Ubc7 was eluted from the beads with SDS gel-loading buffer containing 8 M urea either with or without DTT, resolved by SDS/PAGE, and then subjected to immunoblot analysis with anti-HA Abs. (A) Different patterns of Ubc7 ubiquitylation in cells expressing the E2 variants Ubc7, Ubc7<sub>A89</sub>, or Ubc7<sub>KO</sub> in which the two ERAD E3 ligases Doa10 and Hrd1 are either present or deleted. (B) Identification of the DTT-resistant monoubiquitylation site. Ubc7 variants expressing a single Lys residue at the indicated position were isolated by immunoprecipitation with anti-HA Abs from the respective yeast strains. The immune complexes were resolved by reducing SDS/PAGE and were subjected to immunoblot analysis with anti-HA Abs.

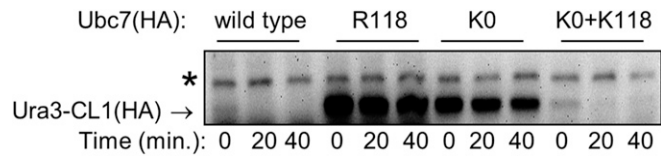

**Fig. S2.** Extended exposure of the immunoblot described in Fig. 1A revealed expression of Ura3-CL1 at time 0 of the CHX-chase experiment that disappeared rapidly in wild-type cells but was substantially stabilized in cells expressing Ubc7<sub>R118</sub> or Ubc7<sub>K0</sub>. The asterisk indicates a cross-reacting protein that serves as a loading control.

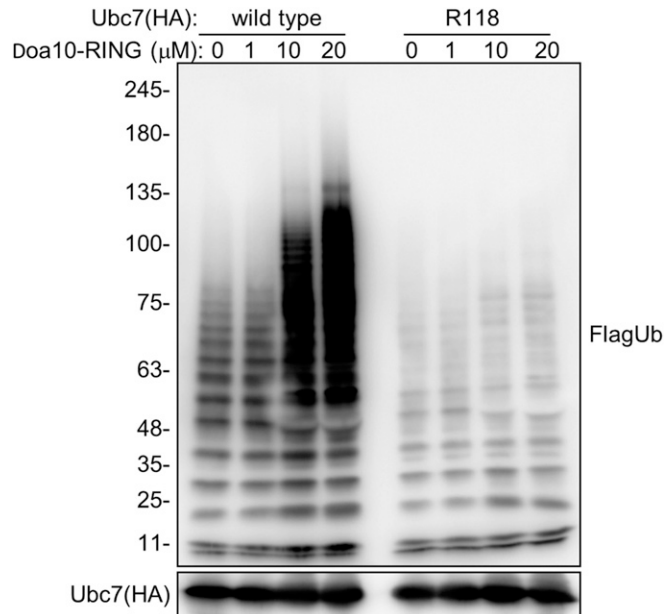

**Fig. S3.** Doa10 RING activates wild-type Ubc7 but not Ubc7<sub>R118</sub>. The in vitro ubiquitylation assay was performed as described in the legend of Fig. 2D with increasing concentrations of GST-Doa10 RING. Ub conjugates were separated by SDS/PAGE followed by immunoblot analysis with anti-FLAG (Ub) and with anti-HA (Ubc7) Abs.

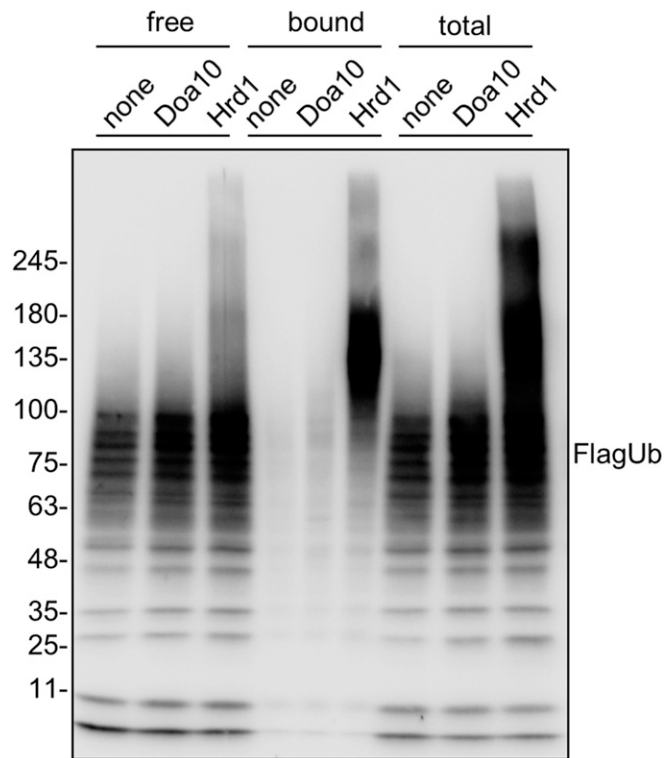

**Fig. S4.** Detection of free polyUb chains after GST pull-down. In vitro ubiquitylation assays were performed as described in the legend to Fig. 2 D and E. Reactions were terminated with a stop solution containing 4 mM EDTA, 20 mM *N*-ethylmaleimide (NEM); then aliquots were removed for determination of total (free and E3-conjugated) ubiquitylation (Total). GST pull down separated E3-conjugated (GST-bound) and free (not GST-bound) polyUb chains. The GST-bound material was eluted with 50 mM glutathione. The various polyUb samples were resolved by SDS/PAGE and subjected to immunoblot analysis with anti-FLAG Abs.

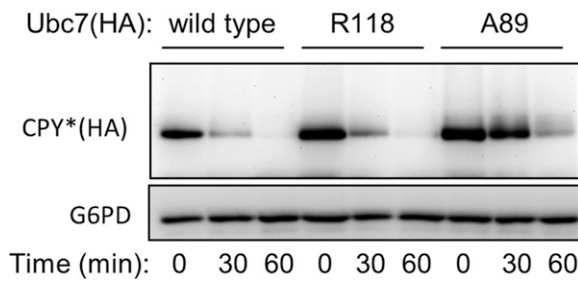

**Fig. S5.** Analysis of CPY\* degradation in cells expressing wild-type Ubc7, Ubc7<sub>R118</sub>, or Ubc7<sub>A89</sub>. CHX-chase experiments were performed; then CPY\*-HA was visualized by immunoblot analysis with anti-HA Abs. G6PD staining provides a loading control.

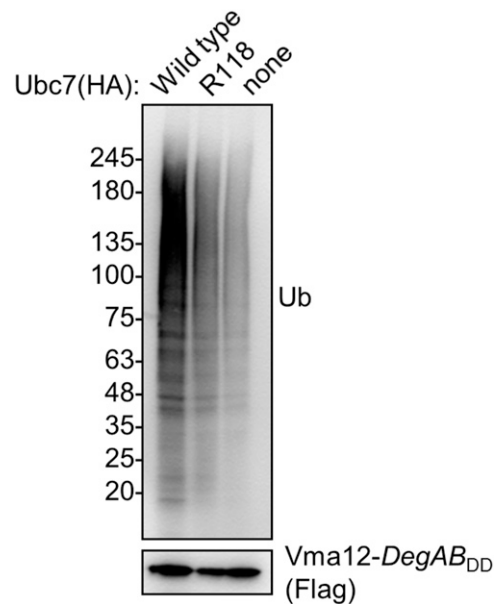

**Fig. S6.** In vivo ubiquitylation of Vma12-DegAB<sub>DD</sub> by Ubc7 and Ubc7<sub>R118</sub>. Vma12-DegAB<sub>DD</sub> was isolated by immunoprecipitation from *ubc7Δ* cells expressing the indicated Ubc7 variants. The immune complexes were subjected to immunoblot analysis with anti-FLAG (VMA12) and anti-Ub Abs.

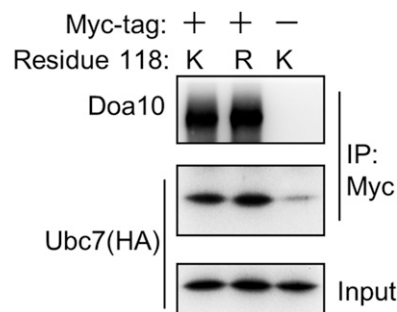

**Fig. S7.** Replacing Lys118 of Ubc7 with Arg did not affect E2-E3 interaction. Cells expressing Myc-tagged Doa10 and either *ubc7* or Ubc7<sub>R118</sub> were lysed and subjected to immunoprecipitation with anti-Myc antibodies. Ubc7 association with Doa10 was determined by analysis of the Doa10 complexes with anti-HA Abs.

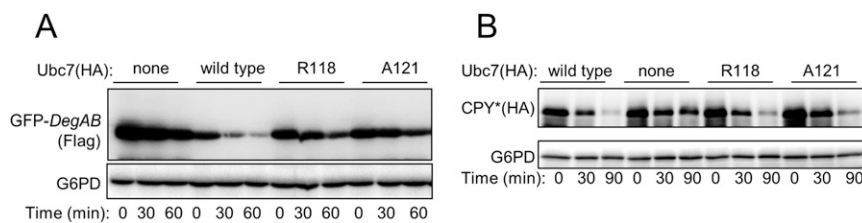

**Fig. S8.** The  $\alpha 2$  helix of Ubc7 is essential for the degradation of Doa10 substrates but is dispensable for the Hrd1 substrates. (A) CHX-chase analysis of the degradation of GFP-DegAB in cells expressing wild-type Ubc7, Ubc7<sub>R118</sub>, or Ubc7<sub>A121</sub>. GFP-DegAB was subjected to Western blot analysis and detected by anti-GFP Abs. (B) A CHX-chase analysis as described in A, except that the substrate used was CPY\*-HA. Proteins were visualized with anti-HA Abs. In A and B, G6PD staining provides a loading control.

**Table S1. Plasmids**

| Plasmid | Relevant markers                                             | Source          |
|---------|--------------------------------------------------------------|-----------------|
| pTR120  | pET-42b(+)-GST-Doa10(1-112)                                  | M. Hochstrasser |
| pTR224  | pOC9-Ura3- <i>CL1</i>                                        | (1)             |
| pTR414  | pCPY*HA (pDN431)                                             | (2)             |
| pTR458  | pRS414-MET25p- <i>Deg1</i> -Vma12-URA3                       | M. Hochstrasser |
| pTR468  | pCR2.1-Ubc7 <sub>K0</sub> -2HA                               | (3)             |
| pTR525  | pTYB2-Ubc7-2HA-ChitinBD                                      | (4)             |
| pTR526  | pTYB2-Ubc7-2HA-ChitinBD Cue1 <sup>ΔTM</sup>                  | (4)             |
| pTR717  | YDp-K- <i>met25p</i> - <i>Deg1</i> -Flag-Vma12-Ura3          | This study      |
| pTR723  | pJET1.2/blunt - <i>Ubc7p</i> -Ubc7-3HA                       | This study      |
| pTR785  | pRS303- <i>Ubc7p</i> -Ubc7-3HA                               | This study      |
| pTR791  | pRS313- <i>Ubc7p</i> -Ubc7-3HA                               | This study      |
| pTR843  | pET14-Ub <sub>R48</sub>                                      | A. Ciechanover  |
| pTR849  | pRS303- <i>Ubc7p</i> -Ubc7 <sub>R57,R62,R70</sub> -3HA       | This study      |
| pTR913  | pRS414-Flag-Vma12- <i>DegAB</i>                              | (5)             |
| pTR941  | pRS314-CPY*-HA                                               | This study      |
| pTR948  | pRS313- <i>Ubc7p</i> -Ubc7 <sub>K0</sub> -3HA                | This study      |
| pTR953  | pRS303- <i>Ubc7p</i> -Ubc7 <sub>K0</sub> -3HA                | This study      |
| pTR977  | pRS303- <i>Ubc7p</i> -Ubc7 <sub>A89</sub> -3HA               | This study      |
| pTR1077 | pRS303- <i>Ubc7p</i> -Ubc7 <sub>R3,R7,R11</sub> -3HA         | This study      |
| pTR1078 | pRS303- <i>Ubc7p</i> -Ubc7 <sub>R156,161R</sub> -3HA         | This study      |
| pTR1086 | pRS303- <i>Ubc7p</i> -Ubc7 <sub>R118</sub> -3HA              | This study      |
| pTR1111 | pRS303- <i>Ubc7p</i> -Ubc7 <sub>R18,R29</sub> -3HA           | This study      |
| pTR1114 | pRS414-Flag-Vma12- <i>DegAB</i> <sub>D950,D951</sub>         | (5)             |
| pTR1119 | pRS303- <i>Ubc7p</i> -Ubc7 <sub>K0+K3</sub> -3HA             | This study      |
| pTR1121 | pRS303- <i>Ubc7p</i> -Ubc7 <sub>K0+K11</sub> -3HA            | This study      |
| pTR1123 | pRS303- <i>Ubc7p</i> -Ubc7 <sub>K0+K18</sub> -3HA            | This study      |
| pTR1125 | pRS303- <i>Ubc7p</i> -Ubc7 <sub>K0+K57</sub> -3HA            | This study      |
| pTR1127 | pRS303- <i>Ubc7p</i> -Ubc7 <sub>K0+K62</sub> -3HA            | This study      |
| pTR1129 | pRS303- <i>Ubc7p</i> -Ubc7 <sub>K0+K118</sub> -3HA           | This study      |
| pTR1138 | pTYB2-Ubc7 <sub>R118</sub> -2HA-ChitinBD-Cue1 <sup>ΔTM</sup> | This study      |
| pTR1404 | pCAU-KHN                                                     | (6)             |
| pTR1406 | pCAU-KWW                                                     | (7)             |
| pTR1454 | pRS314- <i>Ubc7p</i> -Ubc7-3HA                               | This study      |
| pTR1456 | pRS314- <i>Ubc7p</i> -Ubc7 <sub>R118</sub> -3HA              | This study      |
| pTR1469 | pET30-His-Hrd1(287-531aa)                                    | M. Hochstrasser |
| pTR1475 | pET-42b(+)-GST-Hrd1(287-531aa)                               | This study      |
| pTR1500 | pTYB2-Ubc7 <sub>Q118</sub> -2HA-ChitinBD Cue1 <sup>ΔTM</sup> | This study      |
| pTR1502 | pTYB2-Ubc7 <sub>M118</sub> -2HA-ChitinBD Cue1 <sup>ΔTM</sup> | This study      |
| pTR1514 | pTYB2-Ubc7 <sub>A118</sub> -2HA-ChitinBD Cue1 <sup>ΔTM</sup> | This study      |
| pTR1544 | pET14-FlagUb <sub>R48</sub>                                  | This study      |
| pTR1528 | pTYB2-Ubc7 <sub>A121</sub> -2HA-ChitinBD-Cue1 <sup>ΔTM</sup> | This study      |
| pTR1530 | pRS314- <i>Ubc7p</i> -Ubc7 <sub>A89</sub> -3HA               | This study      |
| pTR1611 | pET14 -FlagUb <sub>A8,R48</sub>                              | This study      |
| pTR1615 | pET14-FlagUb <sub>A70,R48</sub>                              | This study      |
| pTR1617 | pTYB2-Ubc7 <sub>E118</sub> -2HA-ChitinBD-Cue1 <sup>ΔTM</sup> | This study      |
| pTR1621 | pRS314 - <i>Ubc7p</i> -Ubc7 <sub>E118</sub> -3HA             | This study      |

A. Ciechanover, Technion – Israel Institute of Technology, Haifa, Israel;  
M. Hochstrasser, Yale University, New Haven, CT.

- Gilon T, Chomsky O, Kulka RG (1998) Degradation signals for ubiquitin system proteolysis in *Saccharomyces cerevisiae*. *EMBO J* 17(10):2759–2766.
- Ng DT, Spear ED, Walter P (2000) The unfolded protein response regulates multiple aspects of secretory and membrane protein biogenesis and endoplasmic reticulum quality control. *J Cell Biol* 150(1):77–88.
- Ravid T, Hochstrasser M (2007) Autoregulation of an E2 enzyme by ubiquitin-chain assembly on its catalytic residue. *Nat Cell Biol* 9(4):422–427.
- Bazirgan OA, Garza RM, Hampton RY (2006) Determinants of RING-E2 fidelity for Hrd1p, a membrane-anchored ubiquitin ligase. *J Biol Chem* 281(51):38989–39001.
- Furth N, et al. (2011) Exposure of bipartite hydrophobic signal triggers nuclear quality control of Ndc10 at the endoplasmic reticulum/nuclear envelope. *Mol Biol Cell* 22(24):4726–4739.
- Vashist S, et al. (2001) Distinct retrieval and retention mechanisms are required for the quality control of endoplasmic reticulum protein folding. *J Cell Biol* 155(3):355–368.
- Vashist S, Ng DT (2004) Misfolded proteins are sorted by a sequential checkpoint mechanism of ER quality control. *J Cell Biol* 165(1):41–52.

**Table S2. Yeast strains**

| Yeast   | Genotype                                                                                                                                                            | Source          |
|---------|---------------------------------------------------------------------------------------------------------------------------------------------------------------------|-----------------|
| TRy109  | $\alpha$ , <i>his3-Δ200, ura3-5, lys2-801, trp1-1, ubc7Δ::LEU2</i>                                                                                                  | (1)             |
| TRy327  | <i>a, ura3-52, trp1-Δ63, his3-Δ200, leu2Δ1, lys2-801, doa10-N1-1319myc13-His3MX6, TRP1::pRH373-2HA-UBC7, ubc7Δ-KanMX</i>                                            | (2)             |
| TRy344  | <i>a, ura3-52, lys2-801::LYS2-Deg1URA3, trp1-Δ63, his3-Δ200, leu2::LEU2-Deg1lacZ, UBC7-3HA-His3MX6</i>                                                              | M. Hochstrasser |
| TRy457  | <i>a, his3-Δ200, leu2-3,112, ura3-52, lys2-801, trp1-1, hrd1Δ::LEU2, doa10Δ::HIS3</i>                                                                               | This study      |
| TRy505  | $\alpha$ , <i>his3-Δ200, leu2-3,112, ura3-5, lys2-801::Met25p-Deg1-Flag-Vma12-Ura3::LYS, trp1-1, ubc7Δ::LEU2</i>                                                    | This study      |
| TRy508  | $\alpha$ , <i>his3-Δ200::pRS303/Ubc7p-Ubc7-3HA::HIS, leu2-3,112, ura3-5, lys2-801::Met25p-Deg1-Flag-Vma12-Ura3::LYS, trp1-1, ubc7Δ::LEU2</i>                        | This study      |
| TRy556  | $\alpha$ , <i>his3-Δ200::pRS303::HIS, leu2-3,112, ura3-5, lys2-801::Met25p-Deg1-Flag-Vma12-Ura3::LYS, trp1-1, ubc7Δ::LEU2</i>                                       | This study      |
| TRy763  | $\alpha$ , <i>his3-Δ200::pRS303/Ubc7p-Ubc7-3HA::HIS, leu2-3,112, ura3-5, lys2-801, trp1-1, ubc7Δ::LEU2</i>                                                          | This study      |
| TRy786  | $\alpha$ , <i>his3-Δ200::pRS303/Ubc7p-Ubc7-3HA::HIS, leu2-3,112, ura3-5, lys2-801::Met25p-Deg1-Flag-Vma12-Ura3::LYS, trp1-1, ubc7::LEU, doa10Δ::HIS3</i>            | This study      |
| TRy802  | <i>a, his3-Δ200::pRS303/Ubc7p-Ubc7<sub>K0</sub>-3HA::HIS, leu2-3,112, ura3-52, lys2-801::Met25p-Deg1-Flag-Vma12-Ura3::LYS2, trp1-1, ubc7::LEU</i>                   | This study      |
| TRy832  | $\alpha$ , <i>his3-Δ200::pRS303/Ubc7p-Ubc7<sub>A89</sub>-3HA::HIS, leu2-3,112, ura3-52, lys2-801::Met25p-Deg1-Flag-Vma12-Ura3::LYS2, trp1-1, ubc7::LEU2</i>         | This study      |
| TRy864  | $\alpha$ , <i>his3-Δ200::pRS303/Ubc7p-Ubc7<sub>R57,R62,R70</sub>-3HA::HIS, leu2-3,112, ura3-52, lys2-801::Met25p-Deg1-Flag-Vma12-Ura3::LYS2, trp1-1, ubc7::LEU2</i> | This study      |
| TRy957  | $\alpha$ , <i>his3-Δ200::pRS303/Ubc7p-Ubc7<sub>R3,R7,R11</sub>-3HA::HIS, leu2-3,112, ura3-52, lys2-801::Met25p-Deg1-Flag-Vma12-Ura3::LYS2, trp1-1, ubc7::LEU2</i>   | This study      |
| TRy960  | $\alpha$ , <i>his3-Δ200::pRS303/Ubc7p-Ubc7<sub>R1,R56,R161</sub>-3HA::HIS, leu2-3,112, ura3-52, lys2-801::Met25p-Deg1-Flag-Vma12-Ura3::LYS2, trp1-1, ubc7::LEU2</i> | This study      |
| TRy975  | $\alpha$ , <i>his3-Δ200::pRS303/Ubc7p-Ubc7<sub>R118</sub>-3HA::HIS, leu2-3,112, ura3-52, lys2-801::Met25p-Deg1-Flag-Vma12-Ura3::LYS2, trp1-1, ubc7::LEU2</i>        | This study      |
| TRy989  | $\alpha$ , <i>his3-Δ200::pRS303/Ubc7p-Ubc7<sub>R18,R29</sub>-3HA::HIS, leu2-3,112, ura3-52, lys2-801::Met25p-Deg1-Flag-Vma12-Ura3::LYS2, trp1-1, ubc7::LEU2</i>     | This study      |
| TRy1033 | <i>a, his3-Δ200::pRS303/Ubc7p-Ubc7<sub>K0+K3</sub>-3HA::HIS, leu2-3,112, ura3-52, lys2-801::Met25p-Deg1-Flag-Vma12-Ura3::LYS2, trp1-1, ubc7::LEU</i>                | This study      |
| TRy1035 | <i>a, his3-Δ200::pRS303/Ubc7p-Ubc7<sub>K0+K11</sub>-3HA::HIS, leu2-3,112, ura3-52, lys2-801::Met25p-Deg1-Flag-Vma12-Ura3::LYS2, trp1-1, ubc7::LEU</i>               | This study      |
| TRy1037 | <i>a, his3-Δ200::pRS303/Ubc7p-Ubc7<sub>K0+K18</sub>-3HA::HIS, leu2-3,112, ura3-52, lys2-801::Met25p-Deg1-Flag-Vma12-Ura3::LYS2, trp1-1, ubc7::LEU</i>               | This study      |
| TRy1041 | <i>a, his3-Δ200::pRS303/Ubc7p-Ubc7<sub>K0+K57</sub>-3HA::HIS, leu2-3,112, ura3-52, lys2-801::Met25p-Deg1-Flag-Vma12-Ura3::LYS2, trp1-1, ubc7::LEU</i>               | This study      |
| TRy1043 | <i>a, his3-Δ200::pRS303/Ubc7p-Ubc7<sub>K0+K62</sub>-3HA::HIS, leu2-3,112, ura3-52, lys2-801::Met25p-Deg1-Flag-Vma12-Ura3::LYS2, trp1-1, ubc7::LEU</i>               | This study      |
| TRy1045 | <i>a, his3-Δ200::pRS303/Ubc7p-Ubc7<sub>K0+K118</sub>-3HA::HIS, leu2-3,112, ura3-52, lys2-801::Met25p-Deg1-Flag-Vma12-Ura3::LYS2, trp1-1, ubc7::LEU</i>              | This study      |
| TRy1070 | $\alpha$ , <i>his3-Δ200::pRS303/Ubc7p-Ubc7<sub>K0+K118</sub>-3HA::HIS, leu2-3,112, ura3-5, lys2-801, trp1-1, ubc7Δ::LEU2</i>                                        | This study      |
| TRy1072 | $\alpha$ , <i>his3-Δ200::pRS303/Ubc7p-Ubc7<sub>K0</sub>-3HA::HIS, leu2-3,112, ura3-5, lys2-801, trp1-1, ubc7Δ::LEU2</i>                                             | This study      |
| TRy1074 | $\alpha$ , <i>his3-Δ200::pRS303/Ubc7p-Ubc7<sub>R118</sub>-3HA::HIS, leu2-3,112, ura3-5, lys2-801, trp1-1, ubc7Δ::LEU2</i>                                           | This study      |
| TRy1126 | <i>a, ura3-52, trp1-Δ63, his3-Δ200, leu2Δ1, lys2-801, ubc7Δ-KanMX</i>                                                                                               | This study      |
| TRy1148 | <i>a, ura3-52, trp1-Δ63, his3-Δ200, leu2Δ1, lys2-801, doa10-N1-1319myc13-His3MX6, ubc7Δ-KanMX</i>                                                                   | M. Hochstrasser |
| TRy1184 | $\alpha$ , <i>his3-Δ200::pRS303/Ubc7p-Ubc7<sub>A89</sub>-3HA::HIS, leu2-3,112, ura3-5, lys2-801, trp1-1, ubc7Δ::LEU2</i>                                            | This study      |
| TRy1281 | <i>a, ura3-52, trp1-Δ63, his3-Δ200, leu2Δ1, lys2-801, TRP1::pRH373-2HA-UBC7, ubc7Δ-KanMX</i>                                                                        | This study      |
| TRy1282 | <i>a, ura3-52, trp1-Δ63, his3-Δ200, leu2Δ1, lys2-801, doa10-N1-1319myc13-His3MX6, TRP1::pRH373-2HA-UBC7<sub>R118</sub>, ubc7Δ-KanMX</i>                             | This study      |

M. Hochstrasser, Yale University, New Haven, CT.

- Jungmann J, Reins H-A, Schobert C, Jentsch S (1993) Resistance to cadmium mediated by ubiquitin-dependent proteolysis. *Nature* 361(6410):369–371.
- Ravid T, Hochstrasser M (2007) Autoregulation of an E2 enzyme by ubiquitin-chain assembly on its catalytic residue. *Nat Cell Biol* 9(4):422–427.
